# Supplementary material
Source: PubMed Central journal article supplement (PMC6814390)
Supplement: NIHMS1528538-supplement-2.pdf [file NIHMS1528538-supplement-2.pdf]

**Figure S1**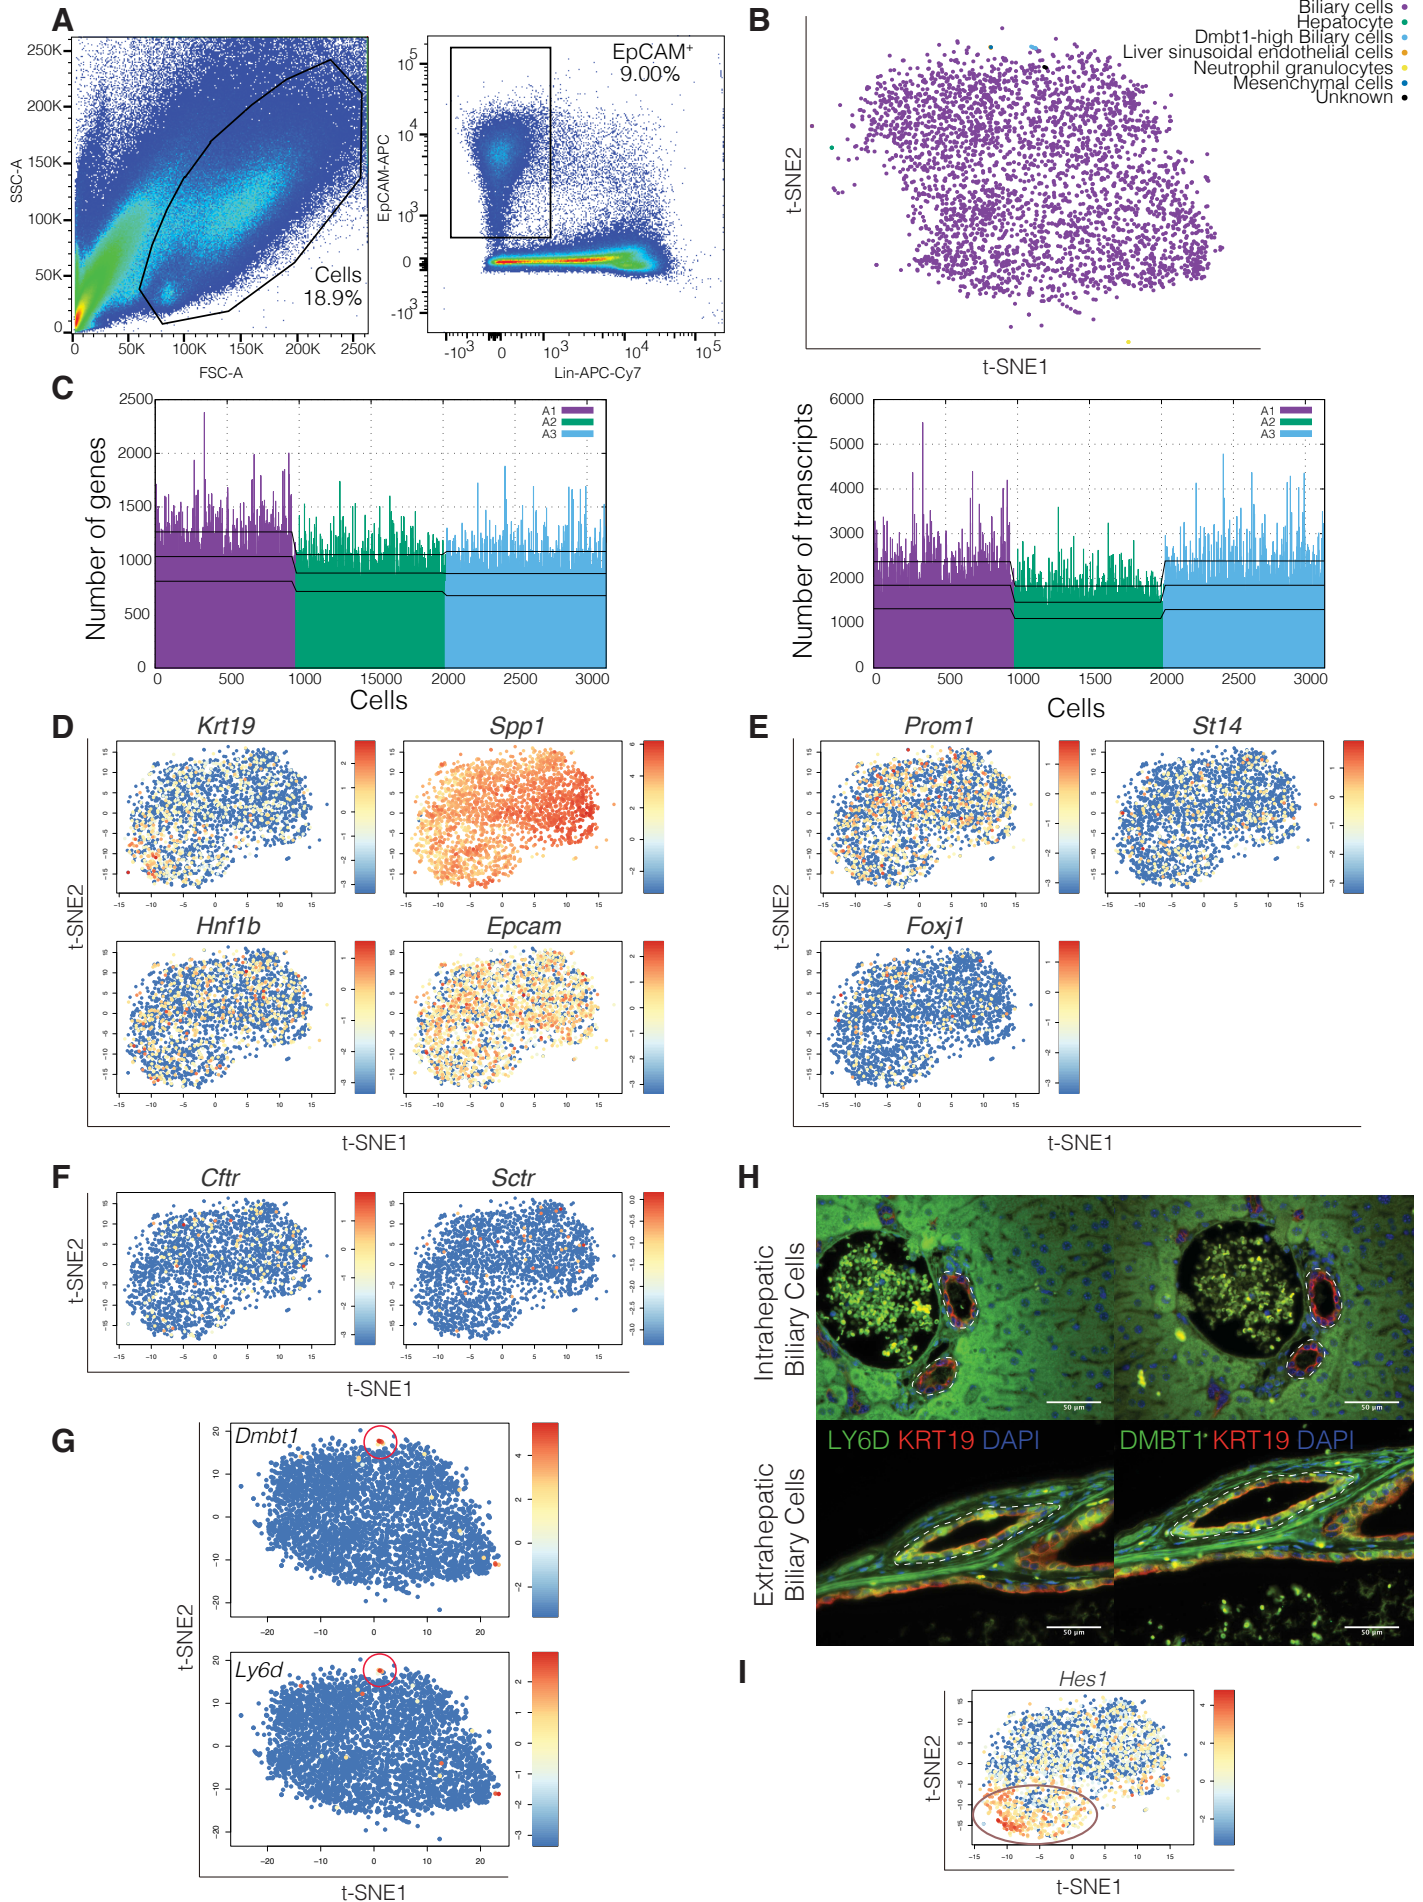

**Figure S1. Extended Analysis of ScRNA-Seq Data for BECs, Related to Figure 1.**

(A) Gating strategy for isolation of BECs by FACS. BECs were sorted on forward scatter (FSC) and side scatter (SSC) and subsequently by EpCAM<sup>+</sup>, Lin<sup>-</sup> (CD11b, CD45, TER119) and DAPI<sup>-</sup>. Approximately 1500 cells per sample were encapsulated with the inDrops platform and analyzed by next generation sequencing.

(B) t-SNE plot of all three combined homeostatic BEC samples identifying non-biliary cells by different colors, which were subsequently excluded from further analysis.

(C) Histograms showing number of annotated genes per cell (Left) and number of transcripts per cell (Right) across three adult homeostatic BEC scRNA-seq samples. Different libraries are indicated in different colors. The black horizontal lines indicate the mean  $\pm$  SD for each library.

(D) t-SNE plots showing expression in log<sub>2</sub> scale of the common biliary markers *Krt19*, *Spp1*, *Hnf1b*, and *Epcam*.

(E) Expression of the previously proposed biliary progenitor markers *Prom1*, *St14*, and *Foxj1*, as represented by t-SNE.

(F) t-SNE plots of genes previously found to correlate with large, distal BECs, *Cftr* and *Sctr*. Colors denote relative expression of respective gene in each cell.

(G) Identification of a populations of extrahepatic biliary cells marked by *Dmbt1* and *Ly6d* expression, as represented by t-SNE. Red circle highlights a small cluster of cells identified by RaceID3 that highly co-express *Dmbt1* and *Ly6d*.

(H) IF for LY6D/KRT19/DAPI and DMBT1/KRT19/DAPI in intrahepatic and extrahepatic BECs. Positive DMBT1 and LY6D signal is only observed in extrahepatic BECs.

(I) t-SNE plot showing expression in log<sub>2</sub> scale of *Hes1*. Colors denote relative expression of respective gene in each cell.

**Figure S2**

**A**

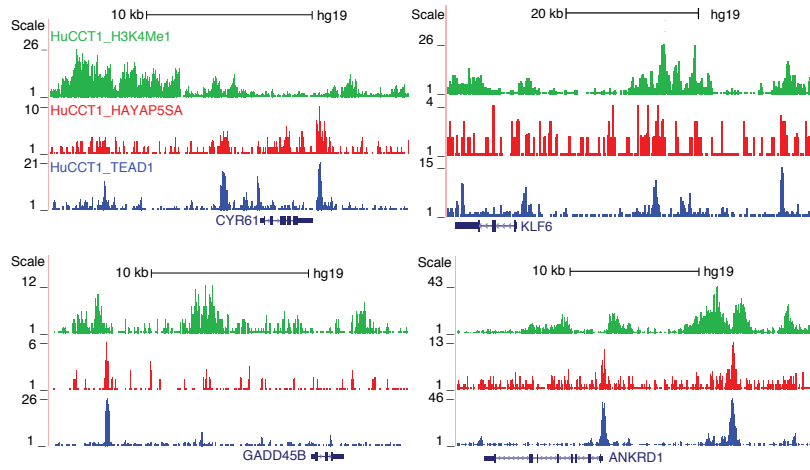

**B**

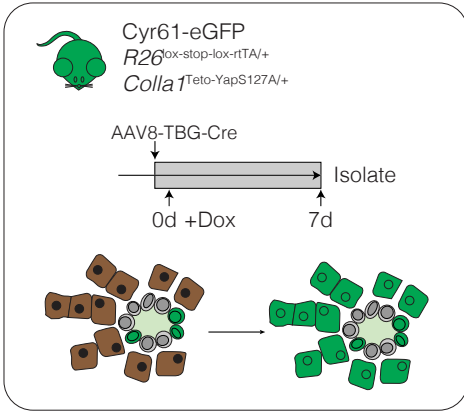

**C**

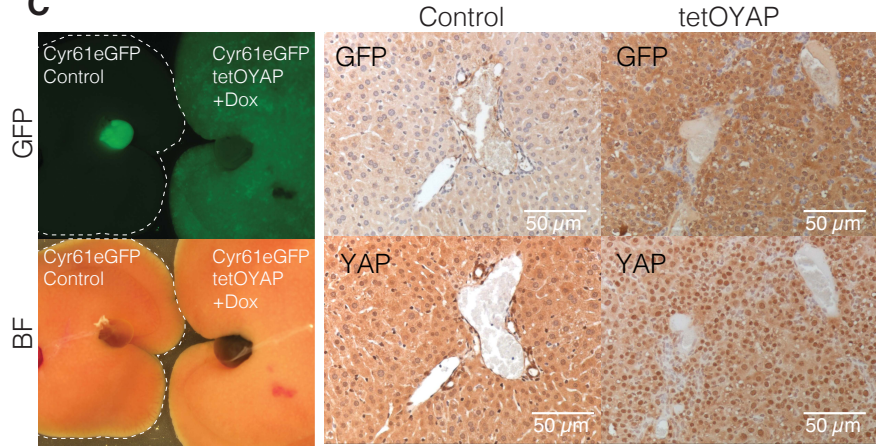

**D**

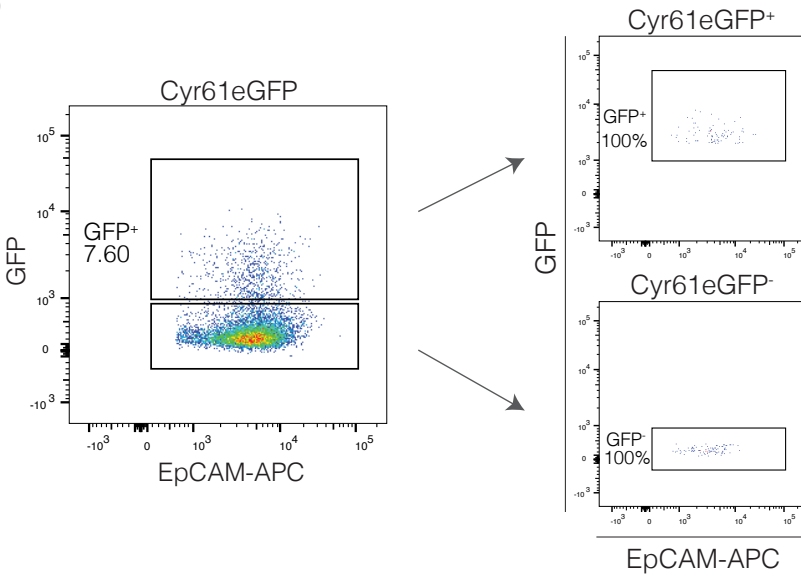

**E**

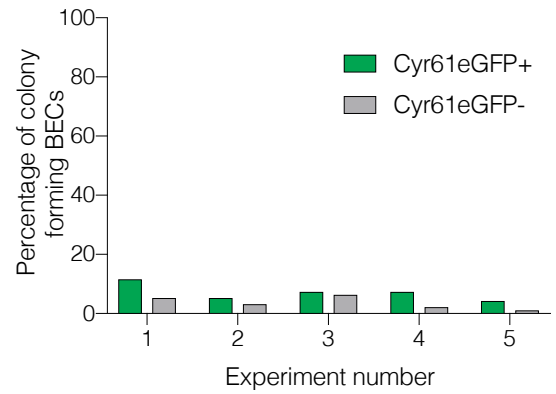

**F**

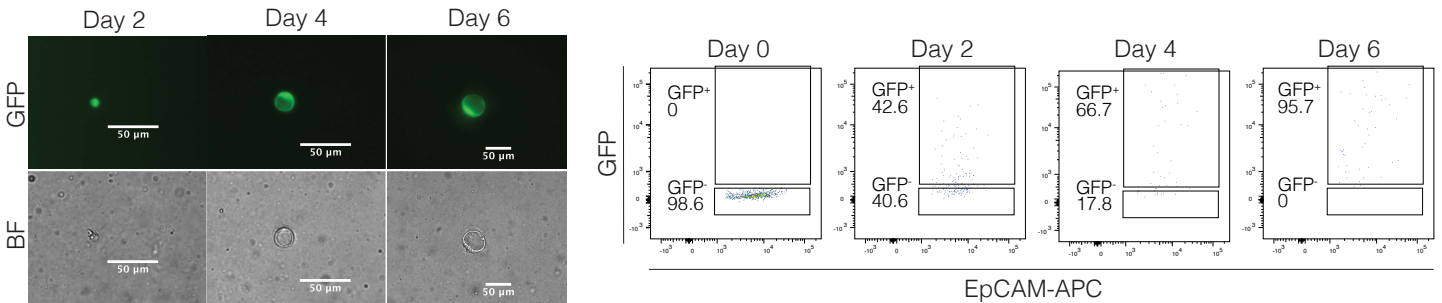

**Figure S2. Genomic Tracks of ChIP-seq Data and Supplementary Data for Cyr61eGFP Mouse Experiments, Related to Figure 2.**

(A) Genomic tracks displaying ChIP-seq data for YAP<sup>5SA</sup> (constitutively-active YAP), TEAD1, and H3K4Me1 in a human liver cholangiocarcinoma cell line, HuCCT1, around the genomic location of genes *CYR61*, *GADD45B*, *KLF6*, and *ANKRD1* identified by scRNA-seq as associated with YAP activity.

(B) Schematic showing genetic mouse model used to examine Cyr61eGFP YAP responsiveness *in vivo*. Cyr61eGFP mice were crossed to *TetOYap* mice (*R26<sup>lox-stop-lox-rtTA/+</sup>; Col1a1<sup>tetO-YapS127A/+</sup>*), which allows for doxycycline inducible expression of constitutively active, YAP<sup>S127A</sup>. These mice were administered AAV8.TBG.PI.Cre.rBG (AAV-Cre) at a dose of  $1 \times 10^{11}$  GC and given doxycycline for 1 week to overexpress of YAP<sup>S127A</sup> specifically in hepatocytes.

(C) Left: Fluorescence and bright field images confirm upregulation of GFP in CYR61eGFP; *TetOYAP* mouse livers as a surrogate for active YAP overexpression upon doxycycline administration compared to control. The bright fluorescent spot in the CYR61eGFP only mouse represents the gallbladder containing fluorescent bile. This is not seen in the *TetOYAP* mouse liver, where bile usually assumes a darker color. Right: IHC of serial sections for GFP, YAP, and pCK in Cyr61eGFP and Cyr61eGFP; *TetOYAP* livers. Active, nuclear YAP is visible in *TetOYap* livers with concurrent GFP upregulation.

(D) FACS plot of EpCAM<sup>+</sup> BECs from Cyr61eGFP mouse livers which were sorted into GFP<sup>-</sup> and GFP<sup>+</sup> populations and plated each in a 96-well plate at a single cell per well. Purity was confirmed in a double sort as indicated in the additional FACS plots.

(E) Bar plot showing percentage of wells that contained colonies 14 days after seeding (n=5 replicative experiments).

(F) Left: Representative fluorescent and bright field images of biliary organoids sorted from EpCAM<sup>+</sup> GFP<sup>-</sup> cells from Cyr61eGFP mouse livers at the indicated time points after seeding. Right: Representative FACS plots of originally 5000 GFP<sup>-</sup> BECs sorted into each organoid well and monitored by FACS for GFP expression at 2 days, 4 days, and 6 days after plating.

**Figure S3**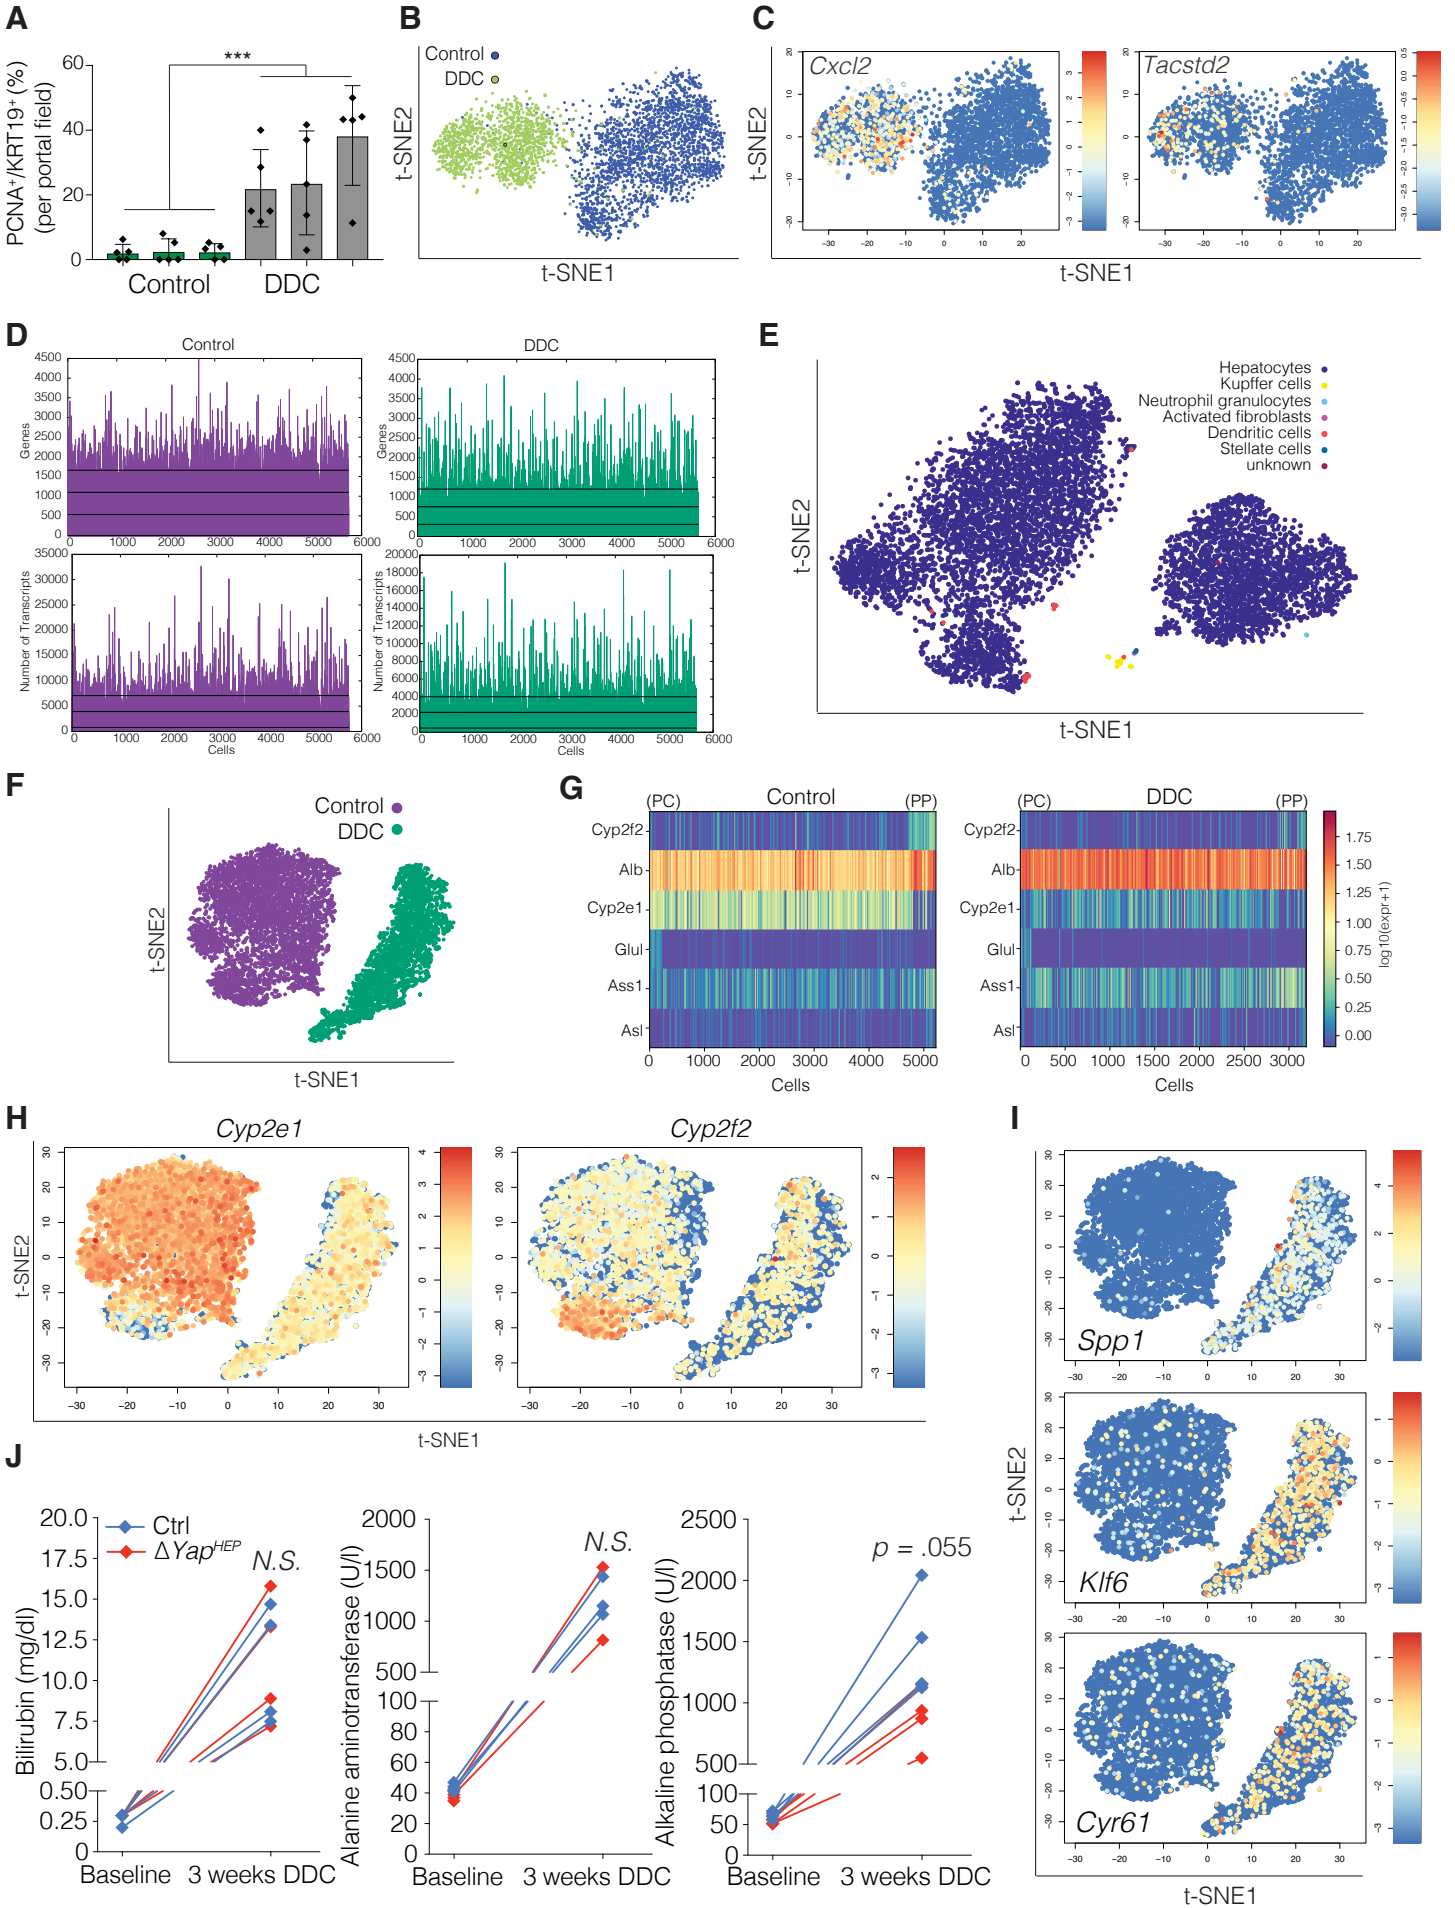

**Figure S3. Extended Data From scRNA-seq Analyses of DDC-Injured BECs and Hepatocytes, Related to Figures 3 and 4.**

(A) Bar-scatter plot indicating the number of PCNA+ BECs assessed by IF of mice fed with standard or DDC-supplemented feed for 1 week. Data are mean  $\pm$  SD of 5 portal fields per mouse (n = 3 mice per group).

(B) t-SNE plot comparing scRNA-seq data from homeostatic (**Figure 1C**) (blue) and DDC-injured BECs (green).

(C) Expression of *Cxcl2* and *Tacstd2*, two well-known upregulated genes upon DDC injury, as represented by t-SNE. Colors denote relative expression of respective gene in each cell (log<sub>2</sub> scale).

(D) Histograms showing number of transcripts per cell and number of annotated genes per cell across homeostatic and DDC-injured hepatocytes from the scRNA-seq samples. The black horizontal lines indicate the mean and mean plus/minus standard deviation for each library.

(E) t-SNE plot of combined hepatocyte samples (control and DDC) identifying non-biliary cells by different colors, which were subsequently excluded from further analysis.

(F) t-SNE plot of scRNA-seq data comparing homeostatic (purple) and DDC-injured hepatocytes (green).

(G) Heatmap of landmark zonation genes evaluated according to the algorithm of Halpern et al. (Halpern et al., 2017) for single hepatocytes isolated from homeostatic and DDC injured livers. Colors denote normalized expression in log<sub>10</sub> scale of respective gene in each cell. Cells in the x axis are ordered according to relative distance to the pericentral (PC) vein area (left) and the periportal (PP) area (right).

(H) Normalized expression in log<sub>2</sub> scale of two well-known hepatocyte zonation genes *Cyp2e1* and *Cyp2f2* as represented by t-SNE of the merged hepatocyte samples (control left, DDC right).

(I) Normalized expression (in log<sub>2</sub> scale) of the ductal marker *Spp1* and of two YAP target genes, *Cyr61* and *Klf6* as represented by t-SNE.

(J) Timeline of blood chemistry analysis of  $\Delta Yap^{HEP}$  mice and controls at baseline and 3 weeks after DDC diet for bilirubin, alanine aminotransferase (ALT) and alkaline phosphatase (n = 4 mice per group).



**Figure S4**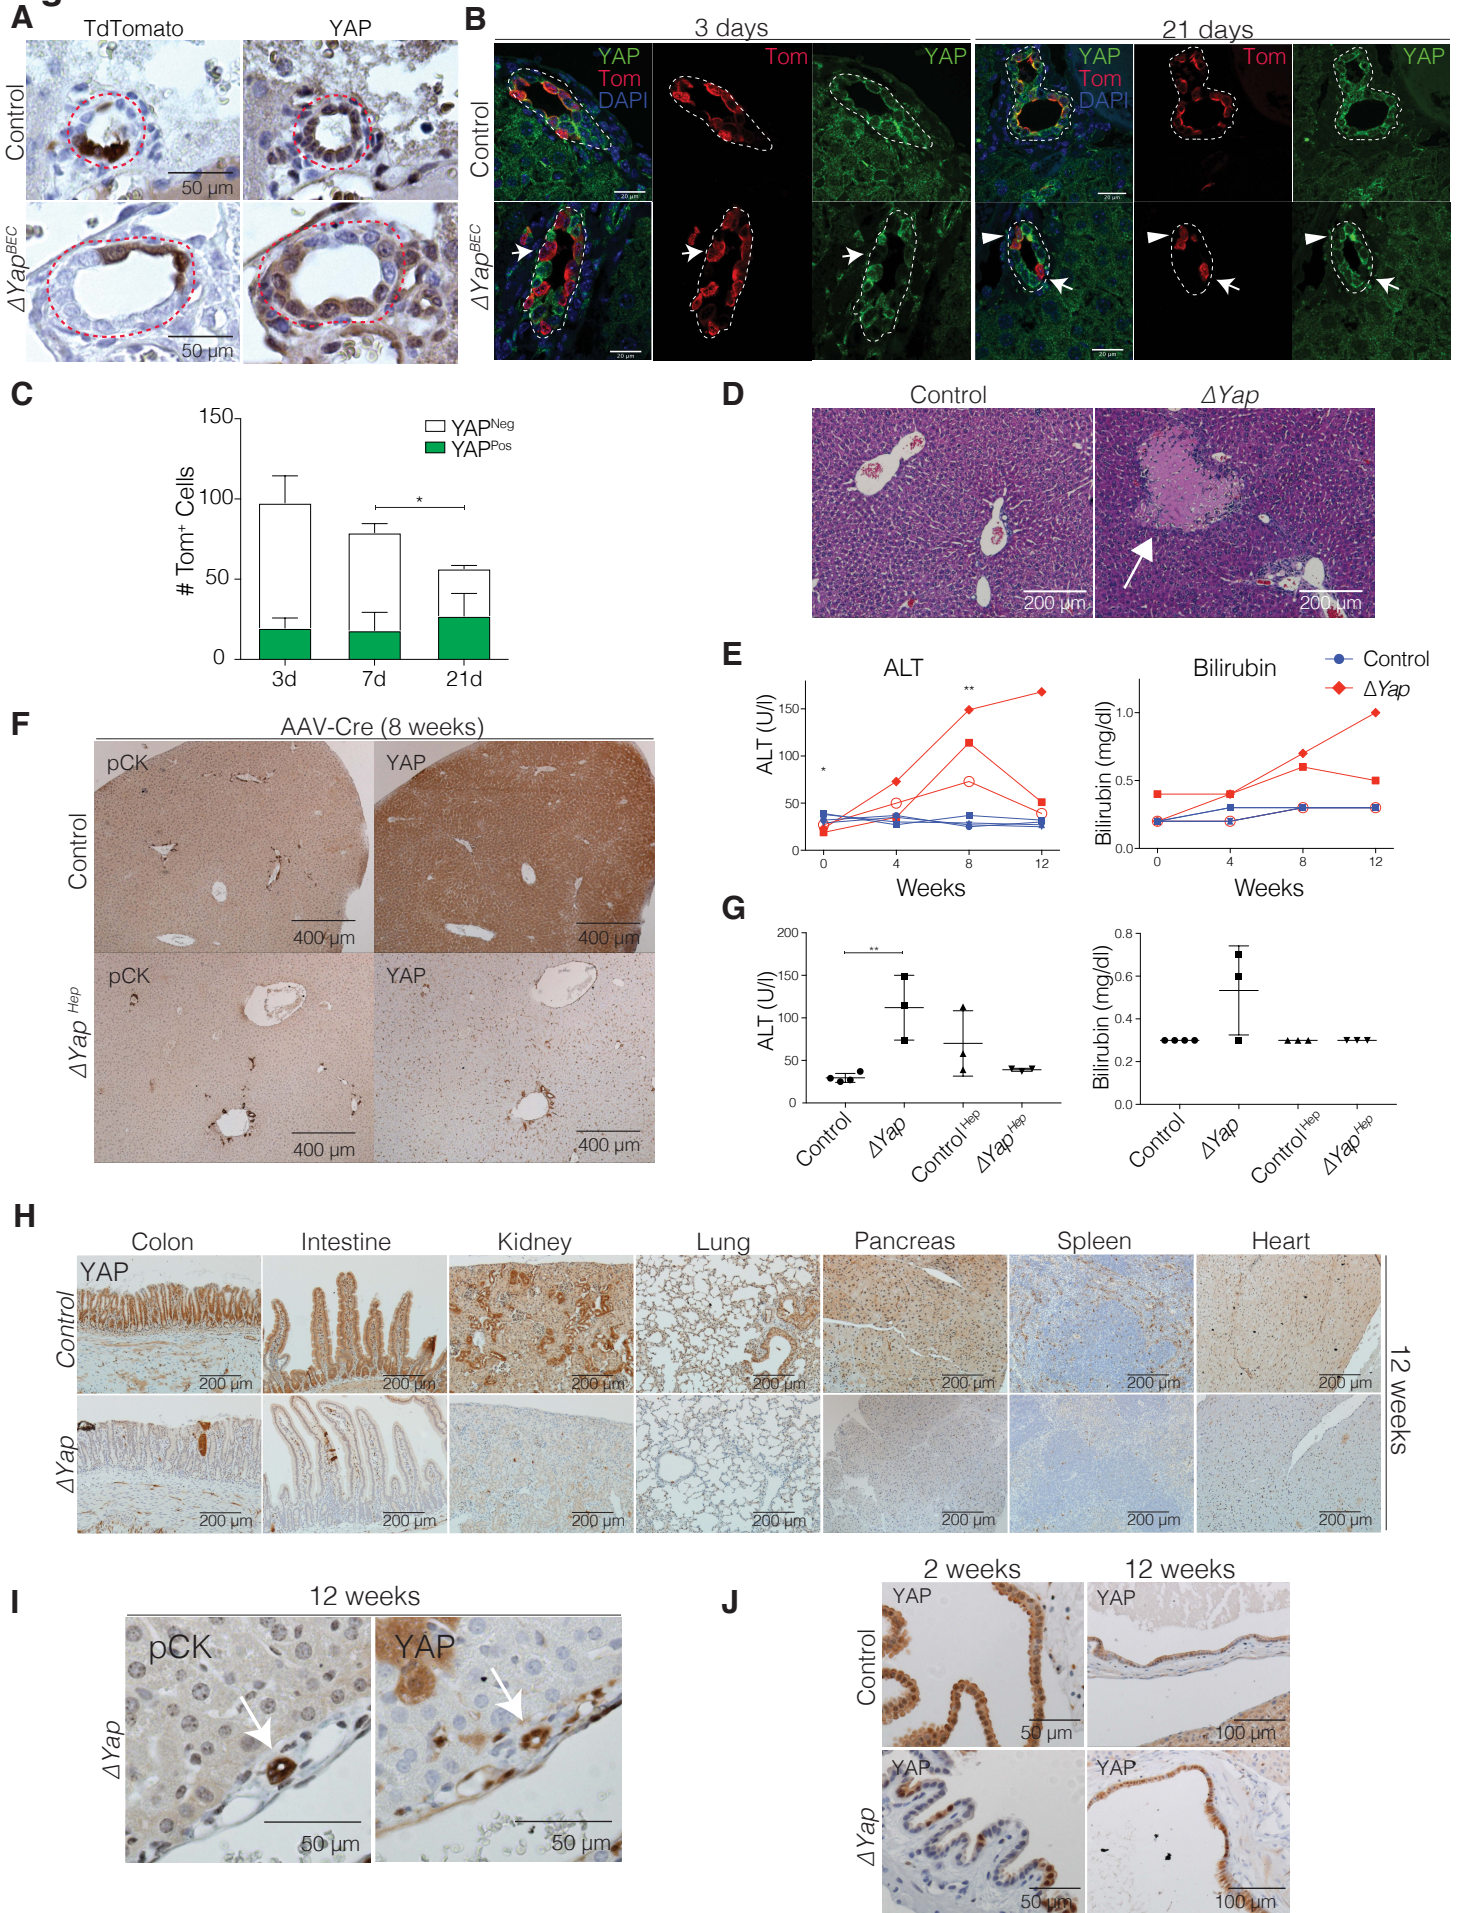

**Figure S4. Effects of Inducible *Yap* KO in BECs, Hepatocytes and All Cells, Related to Figure 5.**

(A) Immunostaining for Tom and YAP in serial liver sections depicting bile ducts from  $\Delta YAP^{BEC}$  and Control mice, 3 days after TAM, demonstrating average *Yap* KO efficiency of ~40%. Dashed lines outline bile ducts.

(B) IF of YAP and Tom, at the indicated time points after *Yap* KO. Arrows indicate Tom<sup>+</sup> YAP<sup>-</sup> cells. Arrowheads illustrate escaper YAP<sup>+</sup> Tom<sup>+</sup> cells at 21 days. Dashed lines highlight bile ducts.

(C) Bar plot illustrating the absolute number of YAP<sup>+</sup> and YAP<sup>-</sup> cells within the Tom<sup>+</sup> cell population. A decrease in the total number of YAP<sup>-</sup> cells over time is observed. Data are mean  $\pm$  SD for 10 portal areas of 2 mice per group.

(D) Low magnification H&E images of  $\Delta YAP$  livers 12 weeks after start with Dox. Arrows indicate patches of necrosis.

(E) Serial blood chemistry analysis for alanine aminotransferase (ALT) and bilirubin levels of  $\Delta YAP$  and Control mice at the designated weeks after start of Dox (n = 3 mice per group). Each line represents a mouse.

(F) Immunostains for pCK and YAP 8 weeks after administration of AAV-Cre ( $1 \times 10^{11}$  GC) to *Yap<sup>fl/fl</sup>*; R26<sup>LSL-TdTomato/+</sup> ( $\Delta YAP^{Hep}$ ) and R26<sup>LSL-TdTomato/+</sup> (Control<sup>Hep</sup>) control mice without observable biological differences.

(G) Blood chemistry analysis (bilirubin and ALT) for  $\Delta YAP^{Hep}$ ,  $\Delta YAP$ , and control mice 8 weeks after recombination. Data are mean  $\pm$  SD with each symbol representing a mouse.

(H) Immunostains for YAP of indicated tissues from  $\Delta YAP$  and Control mice 12 weeks after Dox. No pathological morphology was observed in H&E stains of the selected tissues.

(I) Serial immunostains for pCK and YAP of a portal field from a  $\Delta YAP$  mouse showing escaper YAP<sup>+</sup> BECs (arrows) at the 12-week time point after the start of Dox.

(J) Representative immunostains for YAP from gallbladder in  $\Delta YAP$  and control mice 2 and 12 weeks after start of Dox, indicating significant repopulation by Yap<sup>+</sup> escaper cells over time.



# Figure S5

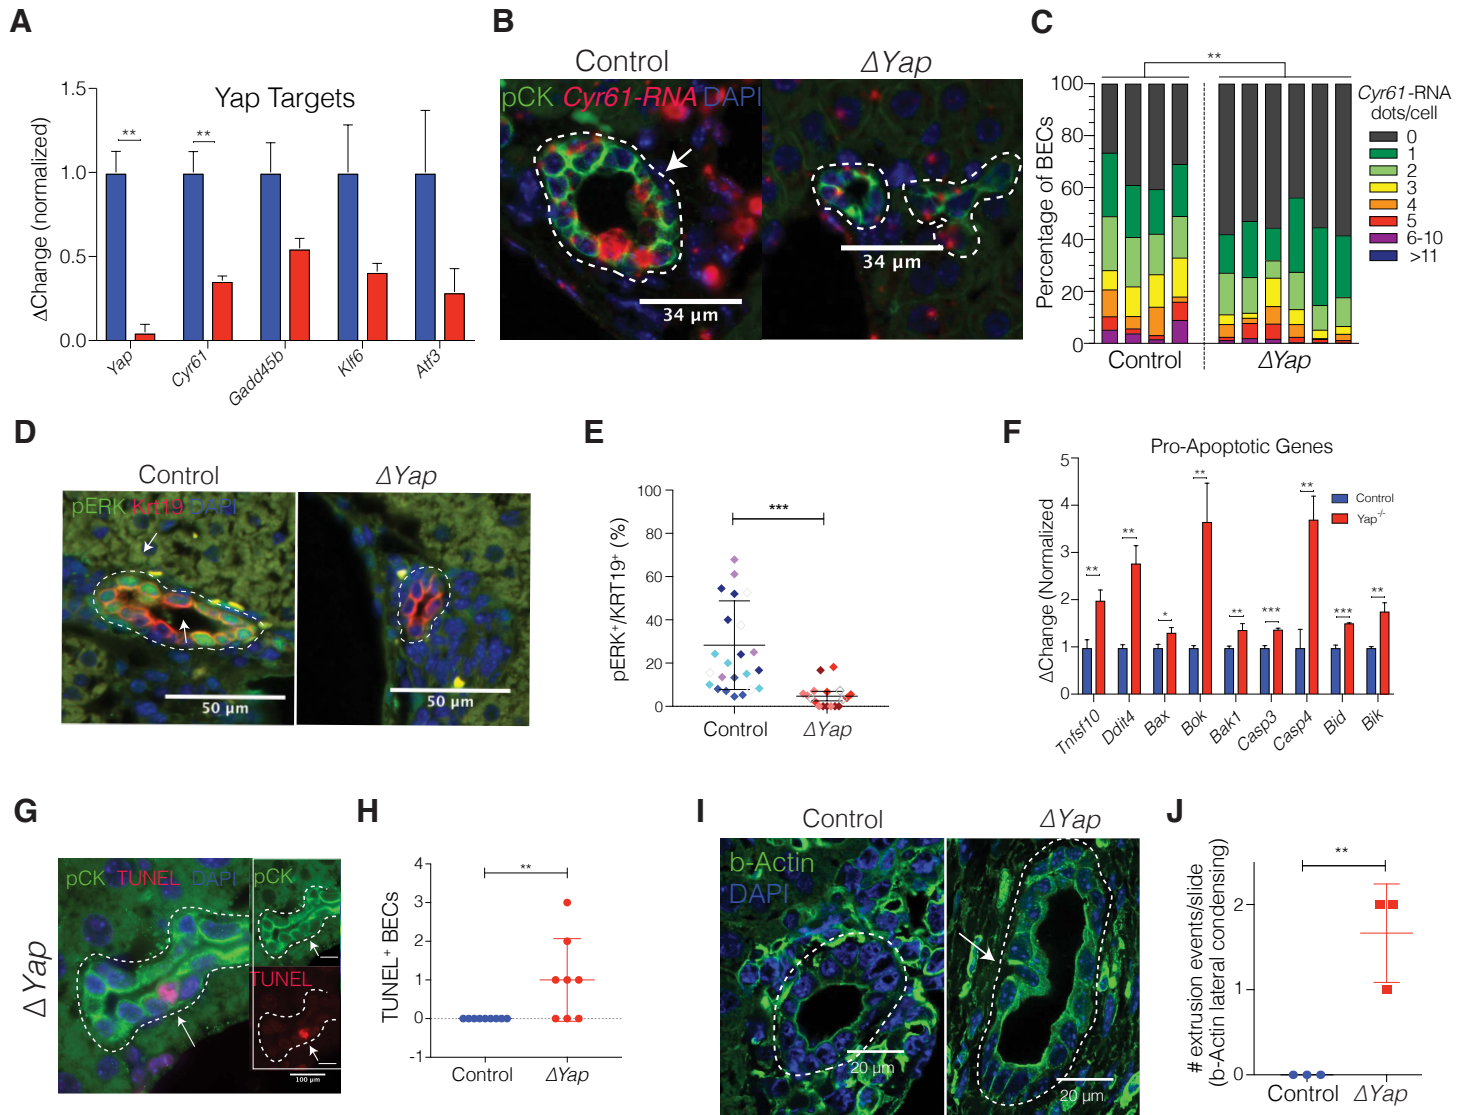

**Figure S5. Evaluation of the transcriptional changes upon *Yap* KO in BECs and Cell Death, Related to Figure 5.**

(A) qRT-PCR of bulk RNA from sorted BECs from  $\Delta Y_{ap}$  and control mice. Data are mean  $\pm$  SD (n = 3 mice per group).

(B) RNA-ISH for *Cyr61* and co-stained for pCK from  $\Delta Y_{ap}$  and Control mice 2 weeks after the start of Dox. Dotted lines highlight bile ducts. Arrow indicates BEC with high counts of *Cyr61* RNA molecules.

(C) Distribution bar plot of *Cyr61*-RNA ISH quantification for  $\Delta Y_{ap}$  and Control mice 2 weeks after the start of Dox. Each bar represents a mouse, and BECs are color-coded according to the contained number of *Cyr61*-RNA and shown as percentage of cumulative 6 portal fields counted. P-values were computed using the Kullback-Leibler test.

(D) IF of pERK and KRT19 of  $\Delta Y_{ap}$  and Control mice 2 weeks after the start of Dox. Dotted lines highlight bile ducts and arrows indicate pERK-positive cells.

(E) Quantification of the ratio of pERK<sup>+</sup> cells per total number of KRT19<sup>+</sup> cells. Each diamond represents a portal field counted, different colors denote each mouse (5 portal fields per mouse). Indicated are mean  $\pm$  SD for three biological replicates.

(F) Fold change of RNA sequencing data of pro-apoptotic genes from BECs upon *Yap* KO. Data are mean  $\pm$  SD (n = 3 per group).

(G) IF for pCK and TUNEL assay depicting a bile duct in a  $\Delta Y_{ap}$  mouse 2 weeks after doxycycline administration. Dotted lines highlight bile ducts and arrow illustrates TUNEL<sup>+</sup> cell.

(H) The total number of TUNEL<sup>+</sup> cells in each portal field per liver section. Data are mean  $\pm$  SD with each dot representing a mouse (n = 9 control, n = 8  $\Delta Y_{ap}$ ).

(I) IF for  $\beta$ -Actin on  $\Delta Y_{ap}$  and Control mice show basal actin condensation in a single cell upon *Yap* KO, typical of cellular extrusion. Dotted lines highlight bile ducts and arrow points to extruding cell in  $\Delta Y_{ap}$  sample.

(J) Quantification of the number of extruding BECs per section. Data are mean  $\pm$  SD (n = 3 mice per group).

**Figure S6**

**A**

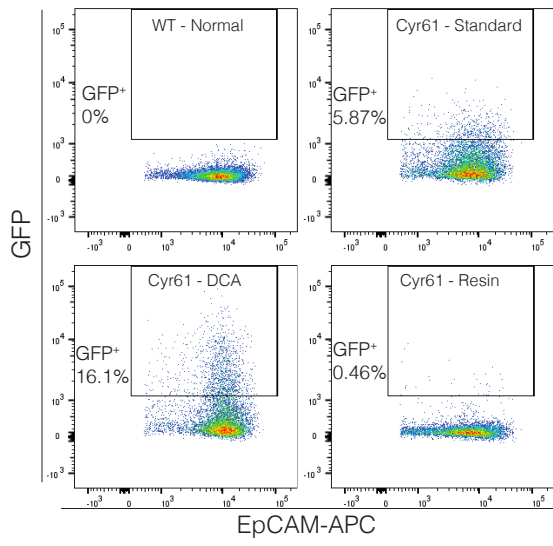

**B**

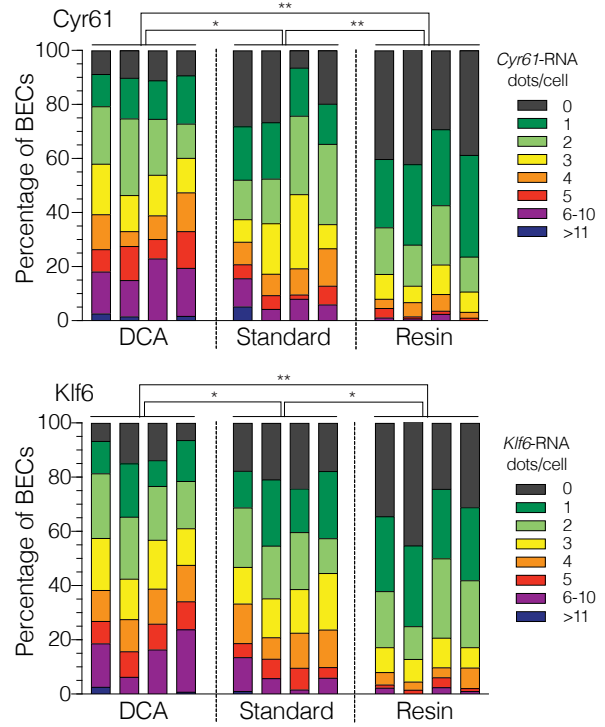

**C**

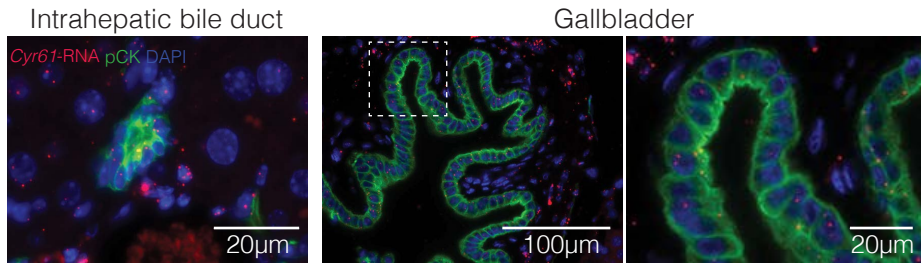

**D**

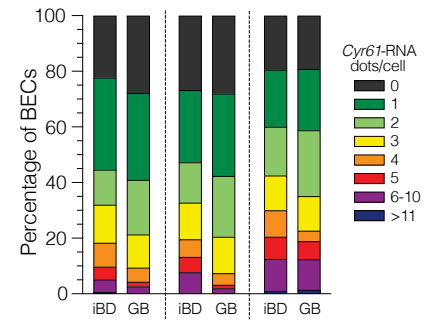

**Figure S6. Effect of BA Modulation on YAP-Target Gene Expression, Related to Figure 6.**

(A) FACS analysis of isolated EpCAM<sup>+</sup> BECs from C57Bl/6J (WT) mice administered standard feed and Cyr61eGFP (Cyr61) mice administered standard, DCA, or resin feed, indicating percentage of GFP<sup>+</sup> cells.

(B) Distribution bar plot of *Cyr61*-RNA and *Klf6*-RNA ISH quantification from **Figure 6E** for the indicated groups. Each bar represents a mouse, and BECs are color-coded according to the contained number of *Cyr61*-RNA and shown as percentage of cumulative 5 portal fields counted. P-values were computed using the Kullback-Leibler test.

(C) Representative images of RNA-ISH for *Cyr61* and co-stained for pCK from intrahepatic bile ducts and gallbladder.

(D) Distribution bar plot of *Cyr61*-RNA ISH quantification of paired intratepatic bile ducts (iBD) and gallbladder (GB) from 3 different mice. BECs are color-coded according to the contained number of *Cyr61*-RNA and shown as percentage of cumulative 5 200X images counted. P-values were computed using the Kullback-Leibler test and were not significant between iBD and GB.



**Figure S7**

**A**

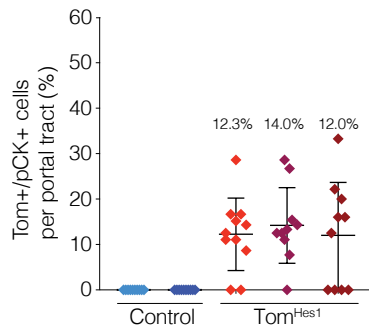

**B**

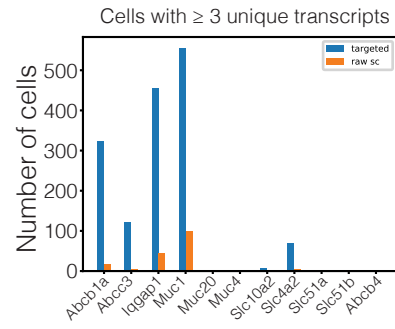

**C**

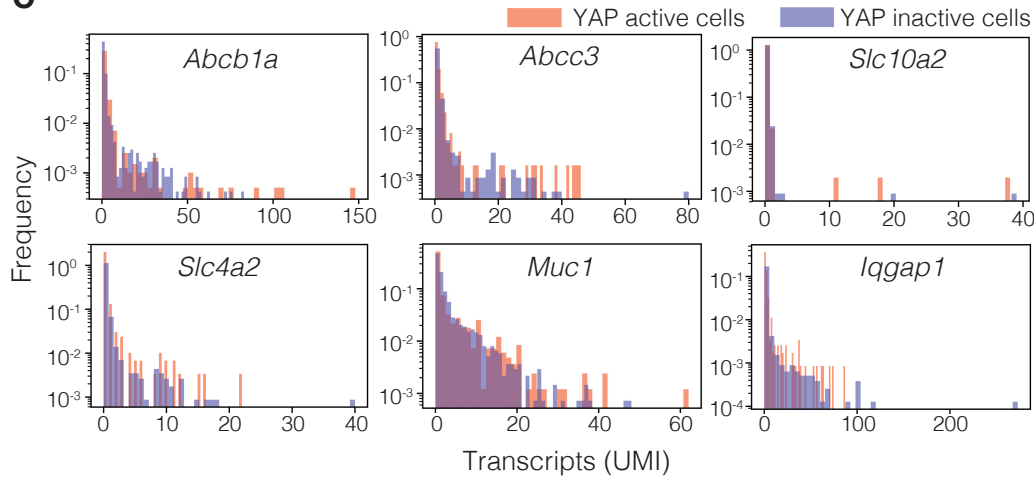

**D**

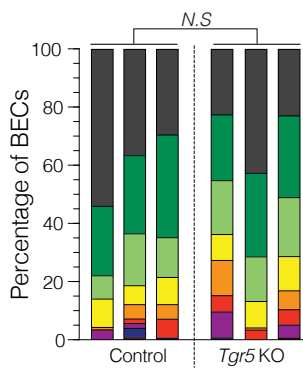

**E**

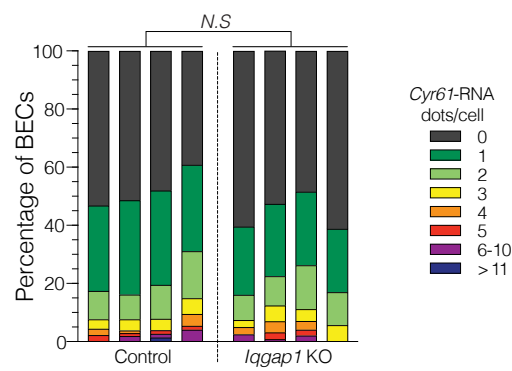

**Figure S7. Targeted scRNA-seq Analysis and Evaluation of *Tgr5* and *Iqgap1* KO on YAP targets in BECs, Related to Figure 7.**

(A) Scatter plot of the quantification of Tom<sup>+</sup> BECs per portal tract in Hes1<sup>CreERT2/+</sup>; R26<sup>LSL-TdTomato/+</sup> mice (Tom<sup>Hes1</sup>, n = 3) and R26<sup>LSL-TdTomato/+</sup> (Control, n = 2), 5 days after administration of 1mg TAM i.p. Each diamond represents a portal tract, indicated are mean ± SD, and average percentage per mouse.

(B) Bar plot depicting the number of cells from the merged control BEC scRNA-seq (Figure 1) containing at least 3 or more unique transcripts for the respective gene in the primary data set (orange) and after targeted amplification (blue). For further information about the selected genes, see **Table S6**.

(C) Histogram of the successfully amplified transcripts from the control BEC scRNA-seq libraries, showing the frequency of cells (y-axis) containing a certain number of unique transcripts (x-axis). Cells are stratified according to their YAP activity as defined in Figure 1, with orange indicating YAP-active cells and blue YAP-inactive cells. No significant differences in expression between the two groups can be observed, and statistical evaluation with Kolmogorov-Smirnov test did not indicate significance for any gene.

(D) Distribution bar plot of *Cyr61*-RNA ISH quantification for *Tgr5* KO and Control. Each bar represents a mouse. BECs are color-coded according to the contained number of *Cyr61*-RNA dots and shown as percentage of cumulative 10 portal fields counted. P-values were computed using the Kullback-Leibler test.

(E) Distribution bar plot of *Cyr61*-RNA ISH quantification for *Iqgap1* KO and Control. Each bar represents a mouse. BECs are color-coded according to the contained number of *Cyr61*-RNA dots and shown as percentage of cumulative 10 portal fields counted. P-values were computed using the Kullback-Leibler test.

**Table S2. Genes which define Dmbt1 cluster analysis from scRNA-seq of homeostatic BECs, Related to Figure 1.**

| Gene Symbol | Mean.ncl | Mean.cl | Fold Change | p-value    |
|-------------|----------|---------|-------------|------------|
| Dmbt1       | 0.1223   | 24.3249 | 198.9246    | < 2.2E-308 |
| S100a6      | 0.2392   | 7.3451  | 30.7031     | 2.12E-10   |
| Spink4      | 0.0908   | 1.3592  | 14.9686     | 0.00388    |
| Ly6d        | 0.0964   | 1.3862  | 14.3785     | 0.00436    |
| Sfn         | 0.1273   | 1.6667  | 13.0943     | 0.00744    |
| Plaur       | 0.1212   | 1.1800  | 9.7368      | 0.00677    |
| Itpkc       | 0.1314   | 1.2363  | 9.4089      | 0.00791    |
| Tff2        | 0.2073   | 1.9164  | 9.2433      | 0.01873    |
| Crip1       | 0.2671   | 2.2153  | 8.2952      | 0.00260    |
| Epha2       | 0.1747   | 1.1910  | 6.8164      | 0.01359    |
| Wfdc2       | 0.2827   | 1.6769  | 5.9320      | 0.03314    |
| F3          | 0.3367   | 1.8754  | 5.5697      | 0.04540    |
| Krt19       | 0.3157   | 1.2966  | 4.1066      | 0.04047    |
| Cox17       | 0.3087   | 1.2236  | 3.9636      | 0.03886    |
| Rps23       | 0.7684   | 2.4225  | 3.1527      | 0.04293    |
| Rn45s       | 0.7807   | 2.4416  | 3.1275      | 0.04463    |
| Fosb        | 0.3400   | 1.0044  | 2.9546      | 0.04618    |
| Jund        | 0.7379   | 2.0305  | 2.7517      | 0.03887    |
| Rps21       | 1.6381   | 4.4879  | 2.7397      | 0.02577    |
| Ifrd1       | 0.7638   | 2.0095  | 2.6309      | 0.04230    |
| Rpl41       | 2.7767   | 6.4499  | 2.3229      | 0.02336    |
| Hspa8       | 3.1836   | 0.5187  | 0.1629      | 0.04136    |
| Spp1        | 17.4675  | 2.0591  | 0.1179      | 4.20E-06   |
| Hspa1b      | 6.7499   | 0.6337  | 0.0939      | 0.00116    |
| Hspa1a      | 4.1376   | 0.2009  | 0.0486      | 0.01591    |
| Anxa5       | 3.4001   | 0.0860  | 0.0253      | 0.03330    |
| Alb         | 4.4723   | 0.0860  | 0.0192      | 0.01138    |
| ApoE        | 11.0453  | 0.0860  | 0.0078      | 1.55E-05   |

**Table S6. List of Genes Selected for Targeted Amplification from scRNA-seq libraries, Related to Figure 7.**

| Gene ID             | Alias   | Function                                                                                           | Amplification |
|---------------------|---------|----------------------------------------------------------------------------------------------------|---------------|
| <b>Transporters</b> |         |                                                                                                    |               |
| Slc10a2             | Asbt    | Main apical BA transporter                                                                         |               |
| Slc4a2              | AE2     | Main apical bicarbonate exporter                                                                   |               |
| Abcb4               | Mdr2    | Basolaterally expressed BA transporter, associated with genetic cholestasis                        | Unsuccessful  |
| Abcb1a              | MDR/TAP | Member of MDR/TAP subfamily, basolateral efflux pump of modified BAs and xenobiotics               |               |
| Slc51a              | Osta    | Basolaterally expressed heteromeric Osta-Ostb exporter                                             | Unsuccessful  |
| Slc51b              | Ostb    | Basolaterally expressed heteromeric Osta-Ostb exporter                                             | Unsuccessful  |
| Abcc3               | Mrp3    | Involved in basolateral BA efflux, expression induced in cholestasis                               |               |
| <b>Receptors</b>    |         |                                                                                                    |               |
| Iqgap1              |         | BA induce Iqgap1 expression which in turn upregulates Yap in hepatocytes (exact mechanism unknown) |               |
| Gpbar1              | Tgr5    | G-coupled-receptor specific for BA                                                                 | Unsuccessful  |
| <b>Mucins</b>       |         |                                                                                                    |               |
| Muc1                |         | Main Mucin, membrane-anchored                                                                      |               |
| Muc4                |         | Evidence for focal expression in small bile ducts, membrane-anchored                               | Unsuccessful  |
| Muc20               |         | Expression pattern unknown, membrane-anchored                                                      | Unsuccessful  |



**Table S7. Primer Sequences, Related to STAR Methods.**

| Murine genotyping primer sequences |                    |                             |
|------------------------------------|--------------------|-----------------------------|
| Genotype                           | Direction          | Sequence 5' to 3'           |
| Col-YapS127A                       | Forward (Common)   | CCCTCCATGTGTGACCAAGG        |
|                                    | Reverse (Wildtype) | GCACAGCATTGCGGACATGC        |
|                                    | Reverse (Mutant)   | GCAGAAGCGCGGCCGTCTGG        |
| Krt19-CreER                        | Forward (Wildtype) | TCTCGCCTCCTACTTGGACAA       |
|                                    | Forward (Mutant)   | CTATCGCCTTCTTGACGAGTT       |
|                                    | Reverse (Common)   | ATATCCCTGACTATCCAAGCA       |
| Rosa26-TdTomato<br>(Jax 007909)    | Forward (Wildtype) | AAGGGAGCTGCAGTGGAGTA        |
|                                    | Reverse (Wildtype) | CCGAAAATCTGTGGGAAGTC        |
|                                    | Forward (Mutant)   | CTGTTCTGTACGGCATGG          |
|                                    | Reverse (Mutant)   | GGCATTAAAGCAGCGTATCC        |
| Rosa26-rtTA                        | Forward            | GGACGAGCTCCACTTAGACG        |
|                                    | Reverse            | AGGGCATCGGTAAACATCTG        |
| Cyr61eGFP                          | Forward            | CGACAGAGCTACGTCACTGCAACAC   |
|                                    | Reverse            | GGTCGGGGTAGCGGCTGAA         |
| Rosa26                             | Forward (Wildtype) | GGAGCGGGAGAAATGGATATG       |
|                                    | Forward (Mutant)   | AAGACCGCGAAGAGTTTGTC        |
|                                    | Reverse (Common)   | AAAGTCGCTCTGAGTTGTTAT       |
| Yapfl/fl                           | Forward (Common)   | AACCACCAAACCTGGCATAG        |
|                                    | Reverse (Wildtype) | GAGGCCAAACCTGACAACATA       |
|                                    | Reverse (Mutant)   | GTGCCCAGTCATAGCCGAATA       |
| CAGs-rtTA3                         | Forward (Common)   | AGTCACTTGTACACAACG          |
|                                    | Reverse (Wildtype) | TGATTATCTGAATTCTGGGATG      |
|                                    | Reverse (Mutant)   | CTCTTATGGAGATCCCTCGAC       |
| Cre                                | Forward            | GCGGTCTGGCAGTAAAACTATC      |
|                                    | Reverse            | GTGAAACAGCATTGCTGTCACTT     |
| Hes1-CreER                         | Forward            | CGTACTGACGGTGGGAGAAT        |
|                                    | Reverse            | TGCATGATCTCCGGTATTGA        |
| Rosa26-TdTomato<br>(Jax 007914)    | Forward (Wildtype) | AAGGGAGCTGCAGTGGAGTA        |
|                                    | Reverse (Wildtype) | CTTTAAGCCTGCCCAGAAG         |
|                                    | Forward (Mutant)   | ACGTCAATAGGGGGCGTACT        |
| Asbt KO                            | Forward (Wildtype) | CCAGGAAGAGTCAGTGCTCAAAACC   |
|                                    | Forward (Mutant)   | GGGATCTCATGCTGGAGTTCTTCG    |
|                                    | Reverse (Common)   | TGAAAGATAGAGGGCAGTCAATGATGG |
| Tgr5 KO                            | Forward (Common)   | GATGCTGGAGCCACTATATCAGGAC   |
|                                    | Reverse (Wildtype) | GACTGCCCTAGAAGGACCCAGAGAC   |
|                                    | Reverse (Mutant)   | GGAACAGAGCACTCTGTGACTTCC    |
| Iqgap1 Ko                          | Forward (Common)   | TTGCAGTCTGTGGCATGTG         |
|                                    | Reverse (Wildtype) | CCTGCTGACAGGTCAATGAT        |
|                                    | Reverse (Mutant)   | CCTGCTCTTTACTGAAGGCT        |

| Primer sequences used for RT-qPCR analysis                        |                                          |                        |
|-------------------------------------------------------------------|------------------------------------------|------------------------|
| Gene                                                              | Direction                                | Sequence 5' to 3'      |
| Apoc1                                                             | Forward                                  | AGAGATCCTTAGATCCAGGGTG |
|                                                                   | Reverse                                  | TGGCTACGACCACAATCAGG   |
| Cyr61                                                             | Forward                                  | AGAGGCTTCCTGTCTTTGGC   |
|                                                                   | Reverse                                  | CCAAGACGTGGTCTGAACGA   |
| Gapdh                                                             | Forward                                  | AAGGTCATCCCAGAGCTGAA   |
|                                                                   | Reverse                                  | CTGCTTACCACCTTCTTGA    |
| Klf6                                                              | Forward                                  | GGGAACAGTTTCTGCTCGGA   |
|                                                                   | Reverse                                  | CAGGCAGGTCTGTTGCCAAT   |
| Yap1                                                              | Forward                                  | CCCTCGTTTTGCCATGAACC   |
|                                                                   | Reverse                                  | TCCGTATTGCCTGCCGAAAT   |
| Gadd45b                                                           | Forward                                  | CTGATGAATGTGGACCCCGA   |
|                                                                   | Reverse                                  | CCTCTGCATGCCTGATACCC   |
| Atf3                                                              | Forward                                  | CTTCCCCAGTGGAGCCAATC   |
|                                                                   | Reverse                                  | TCATTTTGTCTCCAGTCTTCGC |
| Primer sequences used for targeted scRNAseq library amplification |                                          |                        |
| General inDrop forward primer sequence (R1):                      |                                          |                        |
| 5' TCGTCGGCAGCGTCAGATGTGTATAAGAGACAG "gene-specific-sequence" 3'  |                                          |                        |
| General inDrop reverse primer sequence (R2):                      |                                          |                        |
| 3' CAAGCAGAAGACGGCATAACGAGATGGGTGTTCGGGTGCAG 5'                   |                                          |                        |
| Gene                                                              | 3' Gene-specific sequences for R1 primer |                        |
| Slc10a2                                                           | 5' ACAGCCTGGGTTTCTTCCTG 3'               |                        |
| Slc4a2                                                            | 5' CTGCTTTGGGCAGTCATGTC 3'               |                        |
| Abcb4                                                             | 5' GCCGCACCTGCATTGTGATC 3'               |                        |
| Abcb1a                                                            | 5' ATATGGTGTTTAATCCAAGTC 3'              |                        |
| Slc51a                                                            | 5' CTGCCAGACCTGGACTCAGC 3'               |                        |
| Slc51b                                                            | 5' ATCCTGGCAAACAGAAATCG 3'               |                        |
| Abcc3                                                             | 5' TTCCTTGTGTCAGATGGACTCG 3'             |                        |
| Iqgap1                                                            | 5' TGCTTTGGCAGCACCGAGTC 3'               |                        |
| Gpbar1                                                            | 5' GGCCACATTGCTCCTGTGTCAG 3'             |                        |
| Muc1                                                              | 5' CAGCTTTGGCGGTCTGCTC 3'                |                        |
| Muc4                                                              | 5' GGACCCATCCCTCAGTCTGC 3'               |                        |
| Muc20                                                             | 5' CCTCTGTGCCAGAAGAACGG 3'               |                        |
